# Supplementary material
Source: MDPI journal article supplement (https://www.mdpi.com/2673-3986/3/1/5)
Supplement: s1 [file s1]

## SUPPLEMENTARY MATERIALS

**Table S1. Prevalence of substance use**

|                                  | Colleges included in the study (based on 5 colleges) |              | All colleges in the HMS (based on 36 colleges) |              | National estimates from prior studies |
|----------------------------------|------------------------------------------------------|--------------|------------------------------------------------|--------------|---------------------------------------|
|                                  | Weighted %                                           | Unweighted % | Weighted %                                     | Unweighted % | Unweighted%                           |
| <i>Substance use</i>             |                                                      |              |                                                |              |                                       |
| Any alcohol use (past two weeks) | 46.5%                                                | 45.5%        | 48.6%                                          | 49.3%        | 52.5%                                 |
| Any cigarette use (past month)   | 7.3%                                                 | 5.6%         | 7.2%                                           | 5.8%         | 19.1%                                 |
| Any cannabis use (past month)    | 13.7%                                                | 11.7%        | 16.9%                                          | 16.4%        | 20.2%                                 |
| Any vaping (past month)          | 17.8%                                                | 13.7%        | 14.5%                                          | 13.1%        | 22%                                   |
|                                  |                                                      |              |                                                |              |                                       |
| <i>Perceived use</i>             |                                                      |              |                                                |              |                                       |
| Overestimation alcohol use       | 59.8%                                                | 55.7%        | 60.3%                                          | 49.7%        | 50.1%                                 |
| Overestimation cigarette use     | 76.1%                                                | 75.5%        | 72.6%                                          | 67.2%        | 50.5%                                 |
| Overestimation cannabis use      | 77.1%                                                | 79.2%        | 65.8%                                          | 55.6%        | 60.2%                                 |
| Overestimation vaping            | 73.4%                                                | 78.6%        | 72.3%                                          | 68.4%        | 65.8%                                 |

**Table S2. Descriptive statistics**

|                              | Weighted |        |             | Unweighted |        |         |
|------------------------------|----------|--------|-------------|------------|--------|---------|
|                              | N (yes)  | %      | Subpop size | N (Yes)    | %      | Total N |
| <b>College 1</b>             |          |        |             |            |        |         |
| <i>Substance use</i>         |          |        |             |            |        |         |
| Any alcohol use              | 412.5    | 49.41% | 834.8       | 1,171      | 53.64% | 2183    |
| Any cigarette use            | 46.85    | 5.76%  | 813.8       | 125        | 5.87%  | 2131    |
| Any cannabis use             | 138.9    | 13.86% | 1002        | 356        | 13.90% | 2562    |
| Any vaping                   | 118.9    | 14.66% | 810.6       | 308        | 14.48% | 2127    |
|                              |          |        |             |            |        |         |
| <i>Perceived use</i>         |          |        |             |            |        |         |
| Overestimation alcohol use   | 103.1    | 71.19% | 144.8       | 292        | 74.68% | 391     |
| Overestimation cigarette use | 119.2    | 82.29% | 144.8       | 329        | 84.14% | 391     |
| Overestimation cannabis use  | 122.8    | 84.72% | 144.9       | 339        | 86.70% | 391     |
| Overestimation vaping        | 119      | 82.35% | 144.5       | 327        | 83.85% | 390     |
|                              |          |        |             |            |        |         |
| <b>College 2</b>             |          |        |             |            |        |         |
| <i>Substance use</i>         |          |        |             |            |        |         |
| Any alcohol use              | 277.1    | 30.68% | 902.9       | 102        | 33.33% | 306     |
| Any cigarette use            | 79.19    | 9.36%  | 846.2       | 27         | 9.41%  | 287     |

|                              |       |        |        |     |        |      |
|------------------------------|-------|--------|--------|-----|--------|------|
| Any cannabis use             | 103.7 | 10.31% | 1005.9 | 36  | 10.62% | 339  |
| Any vaping                   | 165.3 | 19.54% | 846.2  | 52  | 18.12% | 287  |
|                              |       |        |        |     |        |      |
| <i>Perceived use</i>         |       |        |        |     |        |      |
| Overestimation alcohol use   | 407.3 | 61.56% | 661.7  | 140 | 63.35% | 221  |
| Overestimation cigarette use | 500.5 | 75.65% | 661.7  | 171 | 77.38% | 221  |
| Overestimation cannabis use  | 476.7 | 72.05% | 661.7  | 165 | 74.66% | 221  |
| Overestimation vaping        | 438.1 | 66.21% | 661.7  | 155 | 70.14% | 221  |
|                              |       |        |        |     |        |      |
| <b>College 3</b>             |       |        |        |     |        |      |
| <i>Substance use</i>         |       |        |        |     |        |      |
| Any alcohol use              | 539.1 | 59.50% | 906    | 739 | 60.67% | 1218 |
| Any cigarette use            | 72.14 | 8.13%  | 887.7  | 86  | 7.20%  | 1195 |
| Any cannabis use             | 174.9 | 17.43% | 1005.1 | 224 | 16.65% | 1345 |
| Any vaping                   | 174.5 | 19.69% | 885.9  | 229 | 19.20% | 1193 |
|                              |       |        |        |     |        |      |
| <i>Perceived use</i>         |       |        |        |     |        |      |
| Overestimation alcohol use   | 186.8 | 65.37% | 285.7  | 256 | 66.67% | 384  |
| Overestimation cigarette use | 253.5 | 88.73% | 285.7  | 349 | 90.89% | 384  |
| Overestimation cannabis use  | 237.4 | 83.23% | 285.2  | 330 | 86.16% | 383  |
| Overestimation vaping        | 226.9 | 79.56% | 285.2  | 316 | 82.51% | 383  |
|                              |       |        |        |     |        |      |
| <b>College 4</b>             |       |        |        |     |        |      |
| <i>Substance use</i>         |       |        |        |     |        |      |
| Any alcohol use              | 263.7 | 27.78% | 949.3  | 220 | 17.36% | 1267 |
| Any cigarette use            | 38.52 | 4.27%  | 902.4  | 29  | 2.38%  | 1220 |
| Any cannabis use             | 9.548 | 0.95%  | 1009.1 | 15  | 1.14%  | 1321 |
| Any vaping                   | 27.3  | 3.04%  | 898.8  | 47  | 3.88%  | 1211 |
|                              |       |        |        |     |        |      |
| <i>Perceived use</i>         |       |        |        |     |        |      |
| Overestimation alcohol use   | 303.1 | 43.89% | 690.5  | 414 | 40.95% | 1011 |
| Overestimation cigarette use | 432.7 | 62.81% | 688.9  | 655 | 65.04% | 1007 |
| Overestimation cannabis use  | 470.2 | 68.22% | 689.3  | 744 | 73.81% | 1008 |
| Overestimation vaping        | 486.1 | 70.52% | 689.3  | 775 | 76.88% | 1008 |
|                              |       |        |        |     |        |      |
| <b>College 5</b>             |       |        |        |     |        |      |
| <i>Substance use</i>         |       |        |        |     |        |      |
| Any alcohol use              | 572   | 67.88% | 842.7  | 88  | 67.18% | 131  |
| Any cigarette use            | 74.8  | 9.42%  | 794.5  | 11  | 8.94%  | 123  |
| Any cannabis use             | 258.9 | 25.89% | 1000   | 39  | 25.16% | 155  |
| Any vaping                   | 267.8 | 33.99% | 787.9  | 41  | 33.61% | 122  |
|                              |       |        |        |     |        |      |

|                              |       |        |       |    |        |     |
|------------------------------|-------|--------|-------|----|--------|-----|
| <i>Perceived use</i>         |       |        |       |    |        |     |
| Overestimation alcohol use   | 482.7 | 69.25% | 697.1 | 75 | 69.44% | 108 |
| Overestimation cigarette use | 580.4 | 83.26% | 697.1 | 90 | 83.33% | 108 |
| Overestimation cannabis use  | 603.3 | 86.54% | 697.1 | 93 | 86.11% | 108 |
| Overestimation vaping        | 547.5 | 78.54% | 697.1 | 86 | 79.63% | 108 |

**Table S3: Multivariable logistic regression models showing the association between overestimation of substance use at one's school and substance use, Healthy Minds Study, September 2020 – December 2020**

|                                                                 | Cut-off based on each college |                  |                             |                  | Sensitivity Analysis 1: Cut-off based on national estimates |                  |                               |                  | Sensitivity Analysis 2: Cut-off based on the entire HMS data |                  |                               |                  |
|-----------------------------------------------------------------|-------------------------------|------------------|-----------------------------|------------------|-------------------------------------------------------------|------------------|-------------------------------|------------------|--------------------------------------------------------------|------------------|-------------------------------|------------------|
|                                                                 | Weighted                      |                  | Unweighted                  |                  | Weighted                                                    |                  | Unweighted                    |                  | Weighted                                                     |                  | Unweighted                    |                  |
|                                                                 | aOR<br>[95%<br>CI]            | p-<br>value      | aOR<br>[95%<br>CI]          | p-<br>value      | aOR<br>[95%<br>CI]                                          | p-<br>value      | aOR<br>[95%<br>CI]            | p-<br>value      | aOR<br>[95%<br>CI]                                           | p-<br>value      | aOR<br>[95%<br>CI]            | p-<br>value      |
| Perceptions of alcohol use in the college                       |                               |                  |                             |                  |                                                             |                  |                               |                  |                                                              |                  |                               |                  |
| Overestimated                                                   | <b>2.42</b><br>[2.10, 2.80]   | <b>&lt;0.001</b> | <b>3.65</b><br>[3.00, 4.45] | <b>&lt;0.001</b> | <b>4.18</b><br>[3.08, 5.68]                                 | <b>&lt;0.001</b> | <b>5.56</b><br>[4.58, 6.76]   | <b>&lt;0.001</b> | <b>3.93</b><br>[3.23, 4.77]                                  | <b>&lt;0.001</b> | <b>6.07</b><br>[4.96, 7.42]   | <b>&lt;0.001</b> |
| N                                                               | 2109                          |                  |                             |                  |                                                             |                  |                               |                  |                                                              |                  |                               |                  |
| Perceptions of cigarette use in the college                     |                               |                  |                             |                  |                                                             |                  |                               |                  |                                                              |                  |                               |                  |
| Overestimated                                                   | 1.81<br>[0.47, 7.00]          | 0.293            | <b>2.63</b><br>[1.34, 5.17] | <b>0.005</b>     | <b>2.24</b><br>[1.45, 3.46]                                 | <b>0.007</b>     | <b>2.40</b><br>[1.52, 3.80]   | <b>&lt;0.001</b> | 2.00<br>[0.53, 7.61]                                         | 0.223            | <b>3.10</b><br>[1.66, 5.78]   | <b>&lt;0.001</b> |
| N                                                               | 2093                          |                  |                             |                  |                                                             |                  |                               |                  |                                                              |                  |                               |                  |
| Perceptions of cannabis use in the college                      |                               |                  |                             |                  |                                                             |                  |                               |                  |                                                              |                  |                               |                  |
| Overestimated                                                   | 3.89<br>[0.76, 20.02]         | 0.083            | <b>4.09</b><br>[2.34, 7.14] | <b>&lt;0.001</b> | <b>16.5</b><br>[4.60, 59.24]                                | <b>0.004</b>     | <b>14.24</b><br>[8.69, 23.34] | <b>&lt;0.001</b> | <b>12.63</b><br>[3.21, 49.70]                                | <b>0.007</b>     | <b>11.11</b><br>[6.70, 18.43] | <b>&lt;0.001</b> |
| N                                                               | 2098                          |                  |                             |                  |                                                             |                  |                               |                  |                                                              |                  |                               |                  |
| Perceptions of vaping in the college                            |                               |                  |                             |                  |                                                             |                  |                               |                  |                                                              |                  |                               |                  |
| Overestimated                                                   | 1.32<br>[0.32, 5.42]          | 0.609            | <b>1.97</b><br>[1.30, 2.98] | <b>0.001</b>     | 3.25<br>[0.92, 11.47]                                       | 0.060            | <b>5.06</b><br>[3.40, 7.53]   | <b>&lt;0.001</b> | 2.96<br>[0.70, 12.52]                                        | 0.105            | <b>5.45</b><br>[3.41, 8.74]   | <b>&lt;0.001</b> |
| N                                                               | 2078                          |                  |                             |                  |                                                             |                  |                               |                  |                                                              |                  |                               |                  |
| Adjusted for age, sex, race/ethnicity                           |                               |                  |                             |                  |                                                             |                  |                               |                  |                                                              |                  |                               |                  |
| Reference groups – those who did not overestimate substance use |                               |                  |                             |                  |                                                             |                  |                               |                  |                                                              |                  |                               |                  |
